# Supplementary material for: Shear-Wave-Elastography in Neurofibromatosis Type I
Source: MDPI journal article supplement (doi:10.3390/diagnostics12020360), 2022-01-31
Supplement: s1 [file s1]

| Parameter                                                  | Neurofibromatosis Type 1 (NF 1) | Neurofibromatosis Type 2 (NF 2) | Comparison NF 1 vs. NF 2 |
|------------------------------------------------------------|---------------------------------|---------------------------------|--------------------------|
| SWV of PNT/median nerve in lower arm (m/s)                 | 2.8±0.8 (1.6-4.9)               | 3.8±1.7 (2.5-6.2)               | U= 14.0, p=0.329         |
| SWV of median nerve in extension (m/s) <sup>+</sup>        | 4.4±1.5 (2.0-7.4)               | 4.6±0.5 (4.3-5.3)               | U=21.0, p=0.949          |
| SWV of median nerve in neutral position (m/s) <sup>+</sup> | 2.8±0.7 (1.9-4.0)               | 2.9±0.6 (2.2-3.7)               | U=18.0, p=0.642          |
| SWV of median nerve in flexion (m/s) <sup>+</sup>          | 2.7±0.6 (1.9-3.8)               | 2.3±0.4 (2.45-6.2)              | U=14.0, p=0.343          |
| Selected PNT length in lower arm (mm)                      | 11.9±8.0 (1.4-27.8)             | 7.5±4.4 (3.5-13.7)              | U=12.0, p=0.226          |
| Selected PNT height in lower arm (mm)                      | 3.1±1.9 (1.0-7.4)               | 3.7±1.3 (2.5-5.0)               | U=15.0, p=0.396          |
| Selected width PNT in lower arm (mm)                       | 4.5±3.0 (1.4-12.2)              | 3.8±1.4 (3.0-5.9)               | U=19.0, p=0.731          |

**Supplemental Table S1.** Results for SWE in patients with neurofibromatosis type 1 and 2.

Mean ± standard deviation, (range of all values).

+ different positions are demonstrated in Figure 2.

SWV: shear wave velocity

PNTs: peripheral nerve tumors
